# Supplementary material for: One pot synthesis of two cobalt(iii) Schiff base complexes with chelating pyridyltetrazolate and exploration of their bio-relevant catalytic activities
Source: Royal Society of Chemistry journal article supplement (doi:10.1039/c8ra03035a), 2018-01-01
Supplement: c8ra03035a1.pdf [file c8ra03035a1.pdf]

## Supporting Information

# One pot synthesis of two cobalt(III) Schiff base complexes with chelating pyridyltetrazolate and exploration of their bio-relevant catalytic activities

Kousik Ghosh,<sup>a</sup> Abhisek Banerjee,<sup>a</sup> Antonio Bauzá,<sup>b</sup> Antonio Frontera,<sup>b,\*</sup> and Shouvik

Chattopadhyay<sup>a,\*</sup>

<sup>a</sup> Department of Chemistry, Inorganic Section, Jadavpur University, Kolkata - 700032, India. Tel: +913324572147 e-mail: [shouvik.chem@gmail.com](mailto:shouvik.chem@gmail.com)

<sup>b</sup> Departament de Química, Universitat de les Illes Balears, Crta. De Valldemossa km 7.5, 07122 Palma (Balears), Spain. E-mail: [toni.frontera@uib.es](mailto:toni.frontera@uib.es)

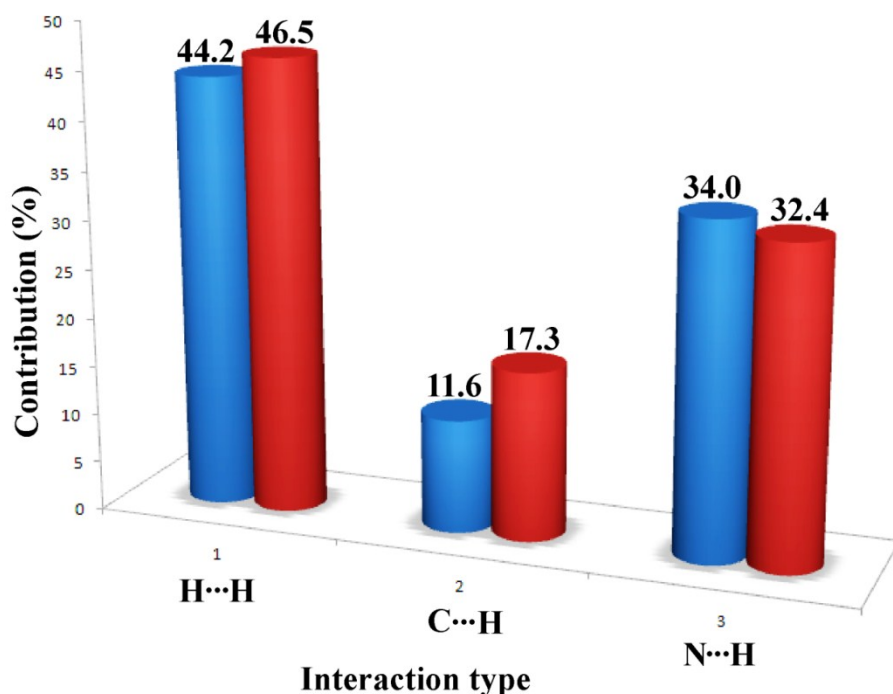

**Figure S1:** Relative contributions to the Hirshfeld surface area for the various intermolecular contacts of complexes **1** and **2**. Colour scheme: Blue = **1** and Red = **2**.

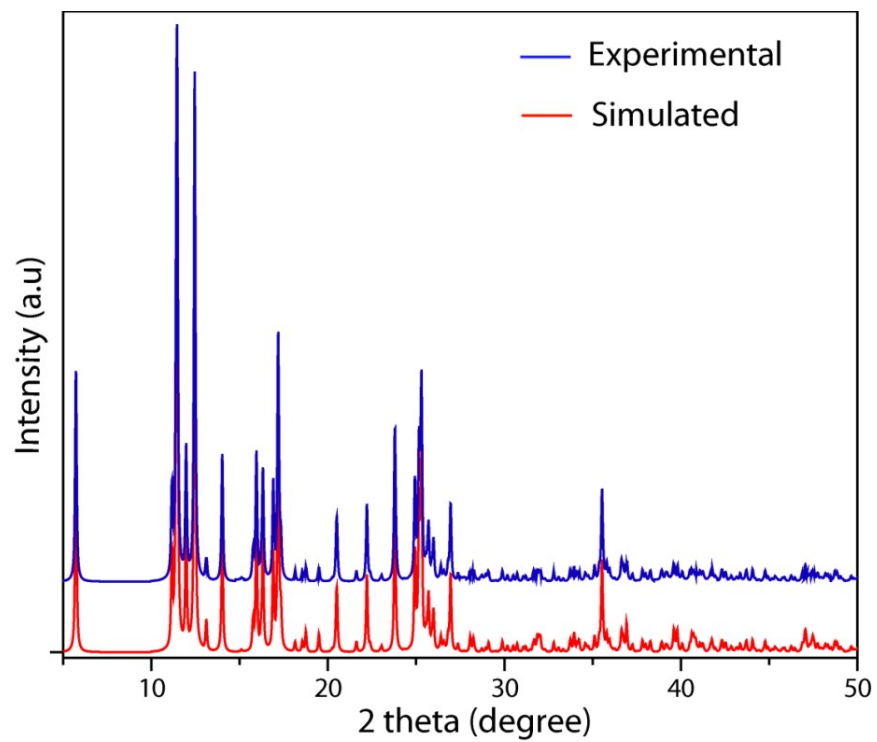

**Figure S2:** Experimental and simulated powder XRD patterns of complex **1**, confirming the purity of the bulk materials.

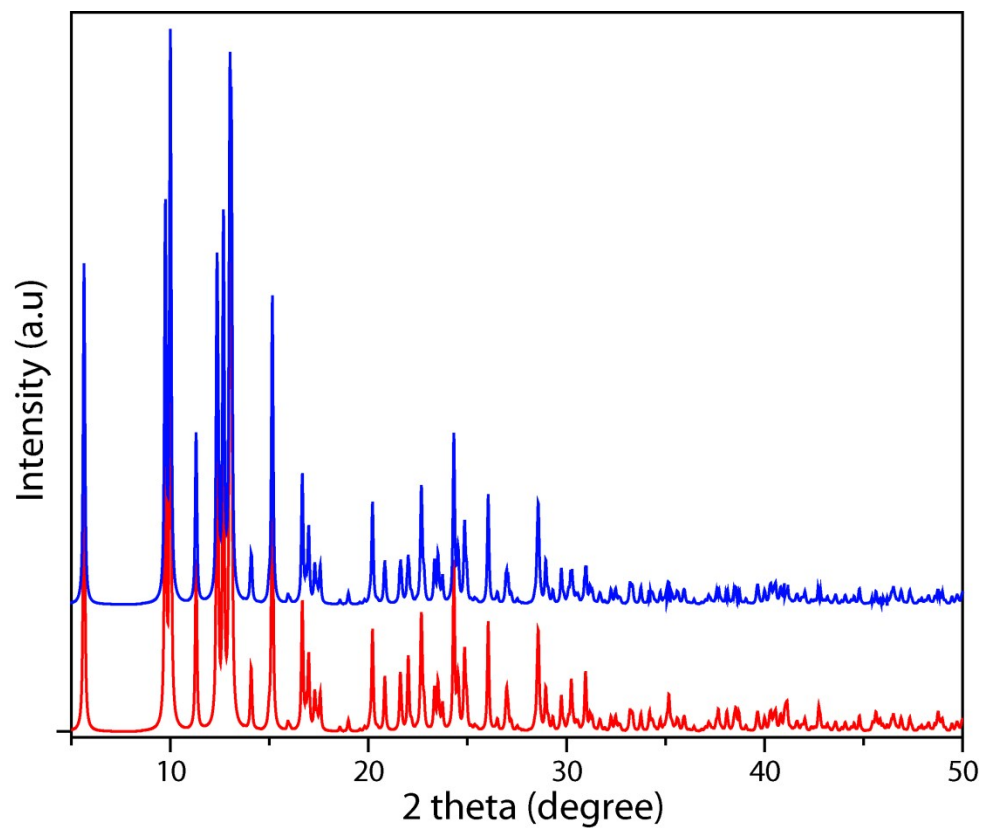

**Figure S3:** Experimental and simulated powder XRD patterns of complex **2**, confirming the purity of the bulk materials.

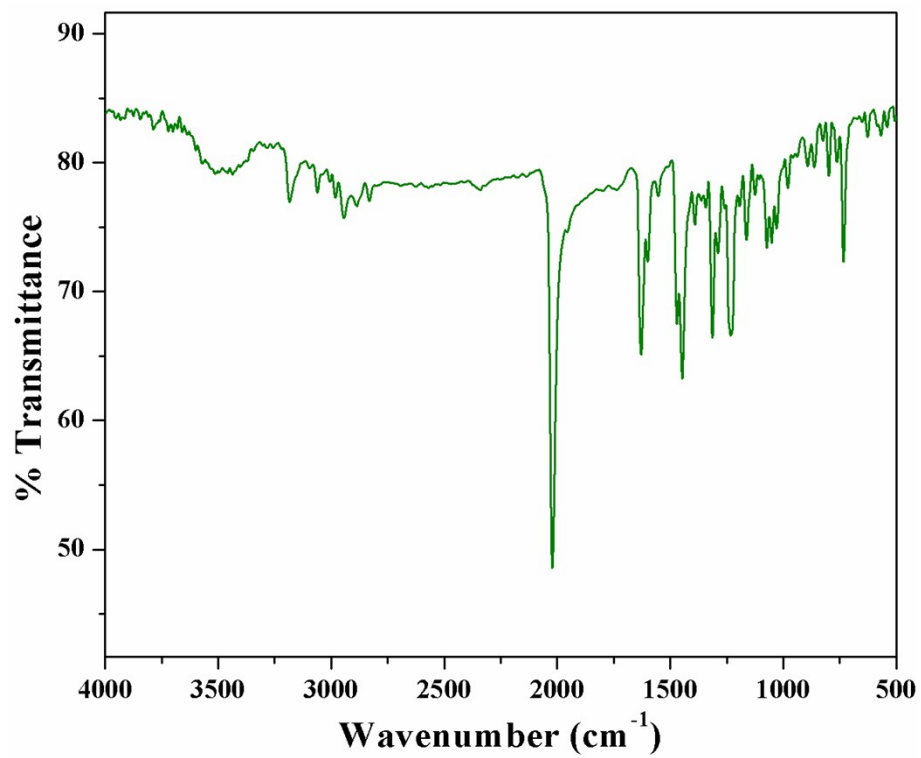

**Figure S4:** Infrared spectrum of complex 1.

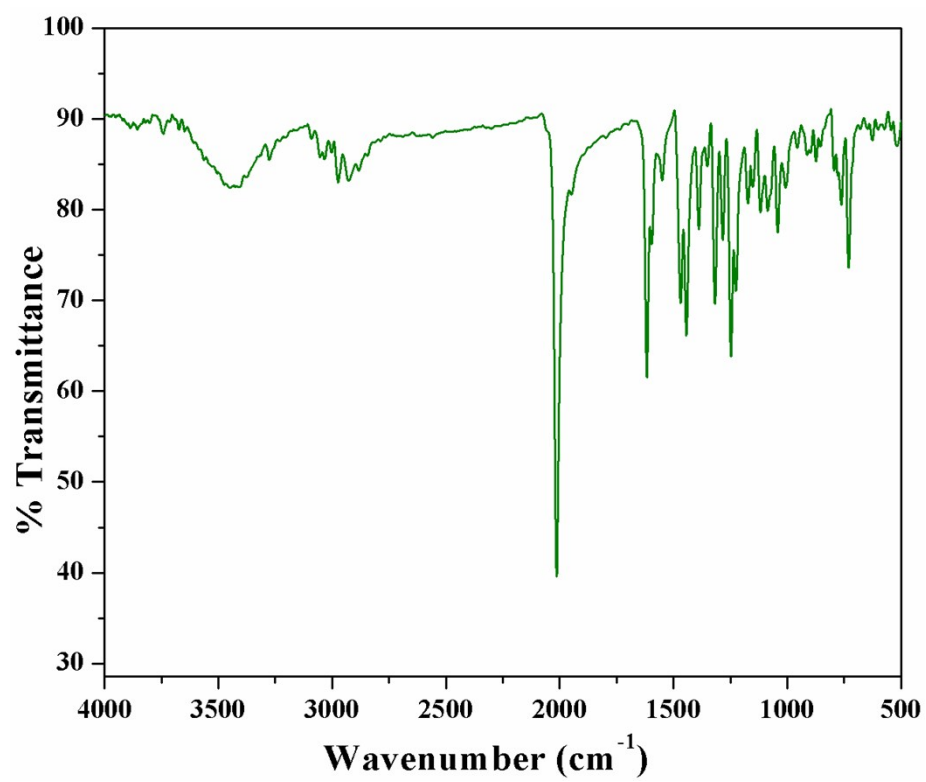

**Figure S5:** Infrared spectrum of complex 2.

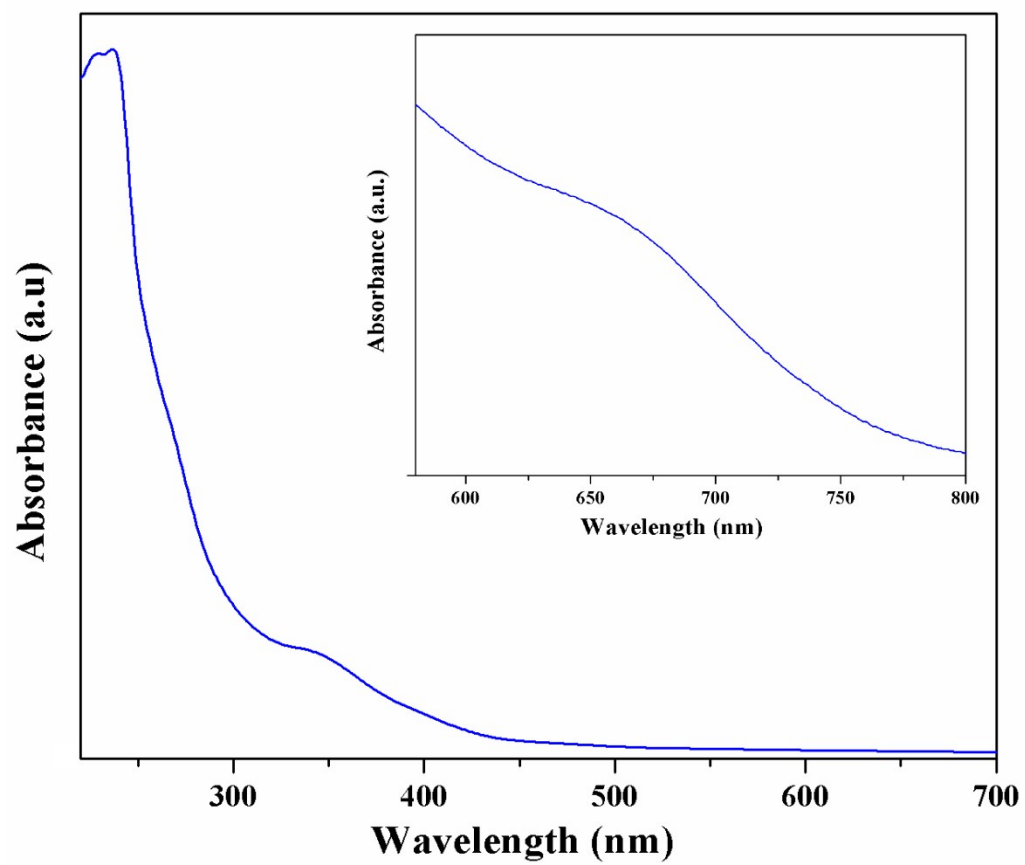

**Figure S6:** Electronic spectrum of complex **1** in acetonitrile medium.

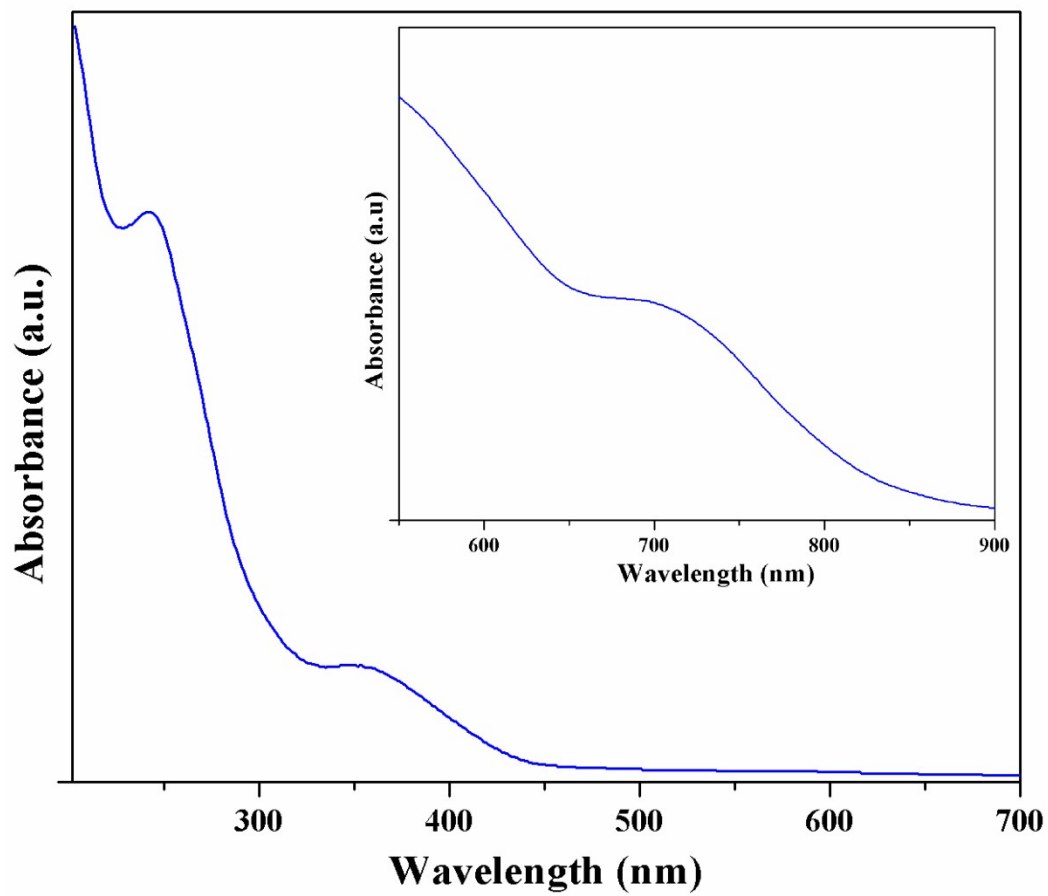

**Figure S7:** Electronic spectrum of complex **2** in acetonitrile medium.

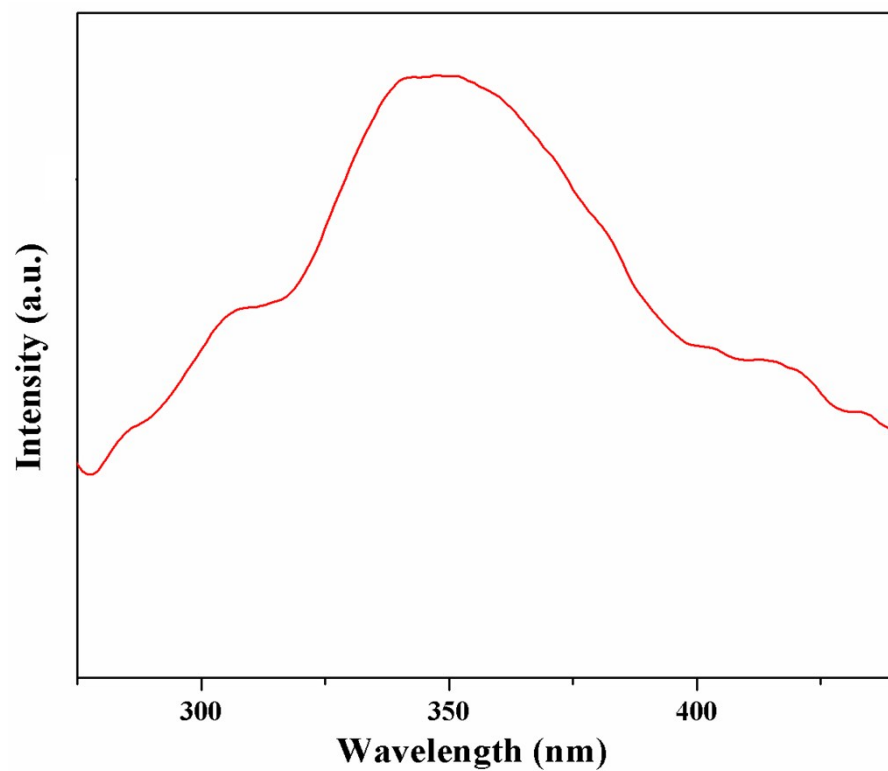

**Figure S8:** Fluorescence spectrum of complex **1** in acetonitrile medium.



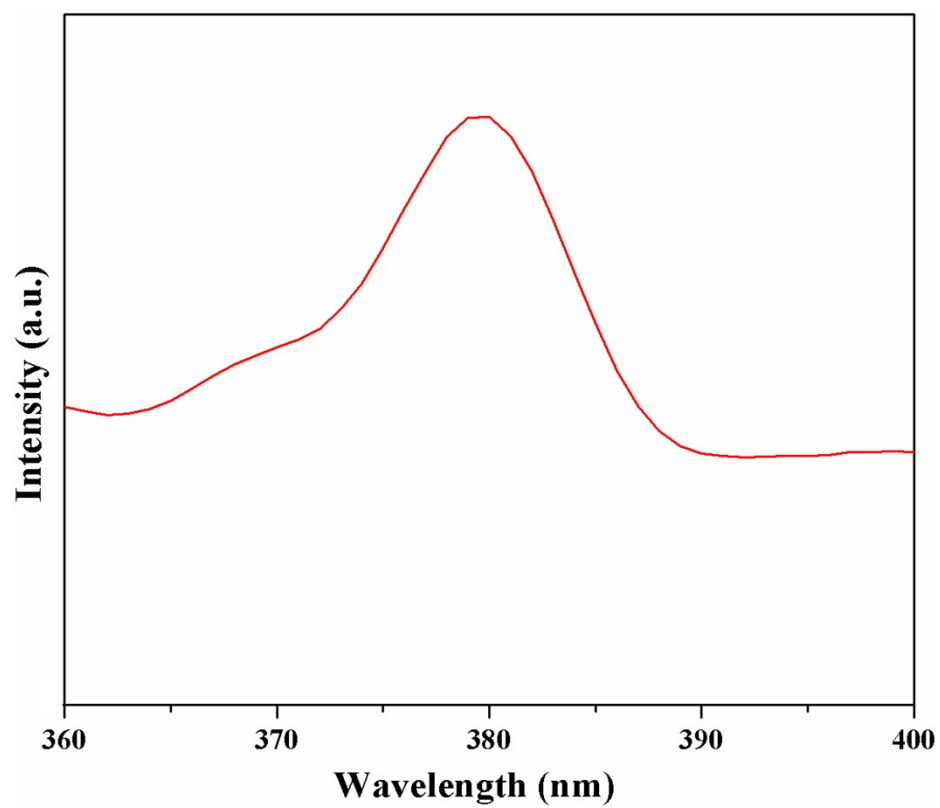

**Figure S9:** Fluorescence spectrum of complex **2** in acetonitrile medium.

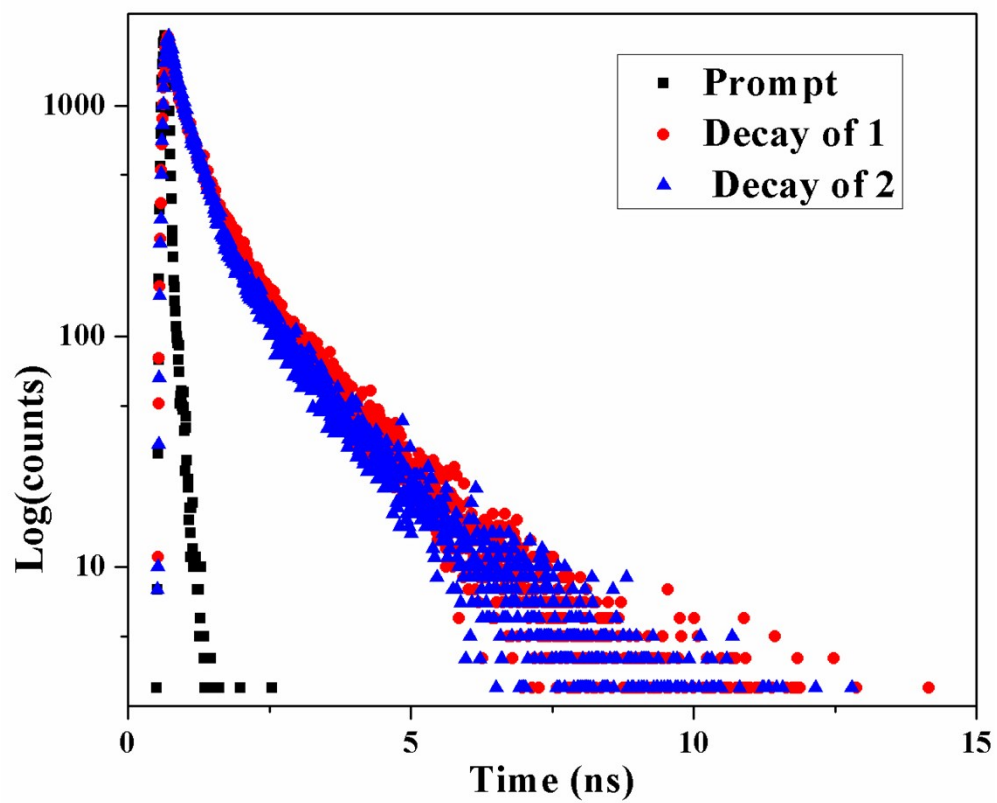

**Figure S10:** Time dependent photoluminescence decay profile of complexes **1** and **2**.

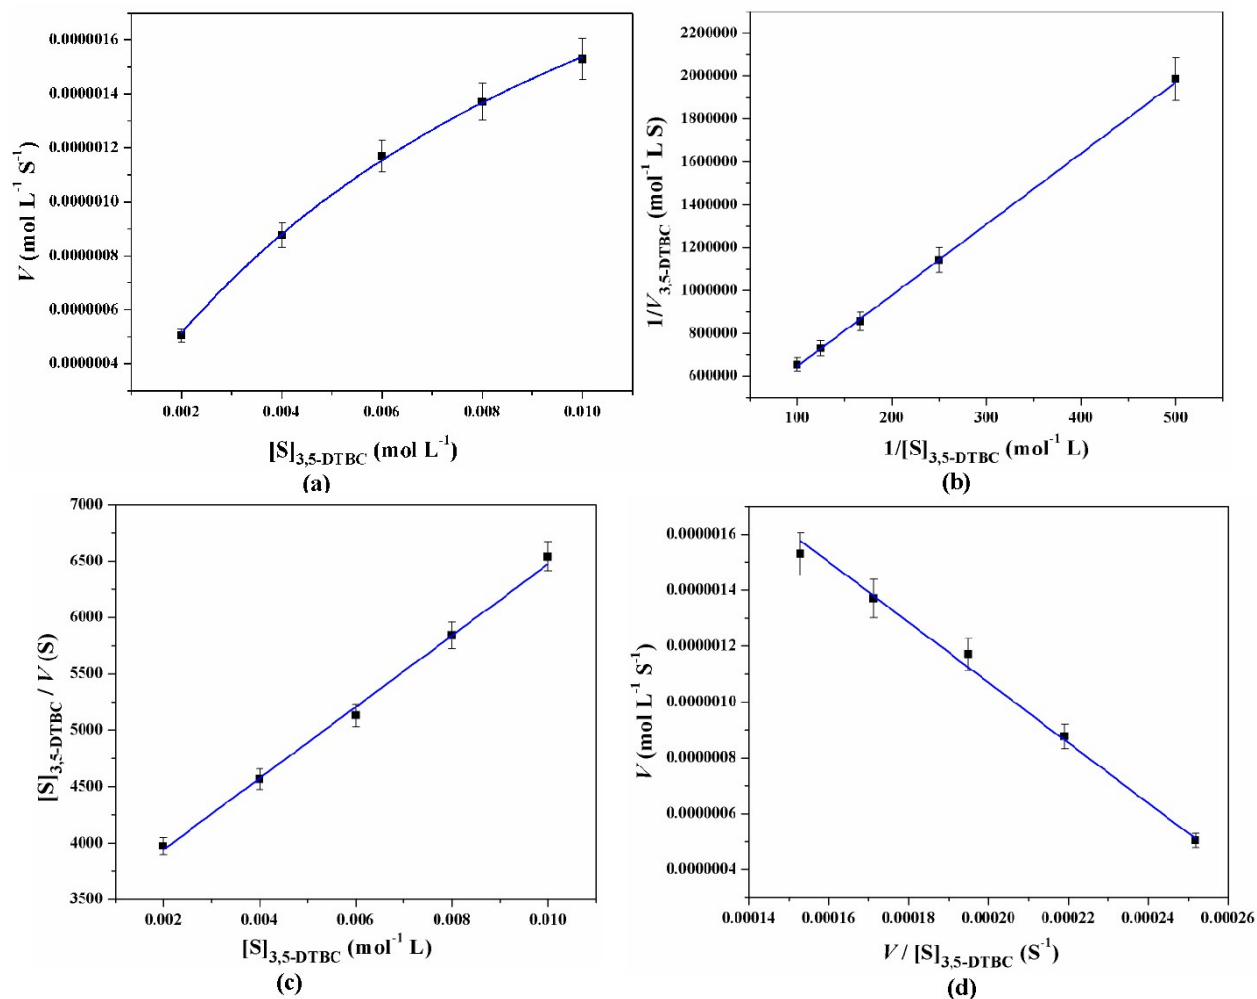

**Figure S11:** Michaelis-Menten plot (a), Lineweaver-Burk plot (b), Hanes plot (c) and Eadie-Hofstee plot (d) of complex **2** for catalytic oxidation of 3,5-DTBC in acetonitrile-methanol (2:1) mixture at room temperature.

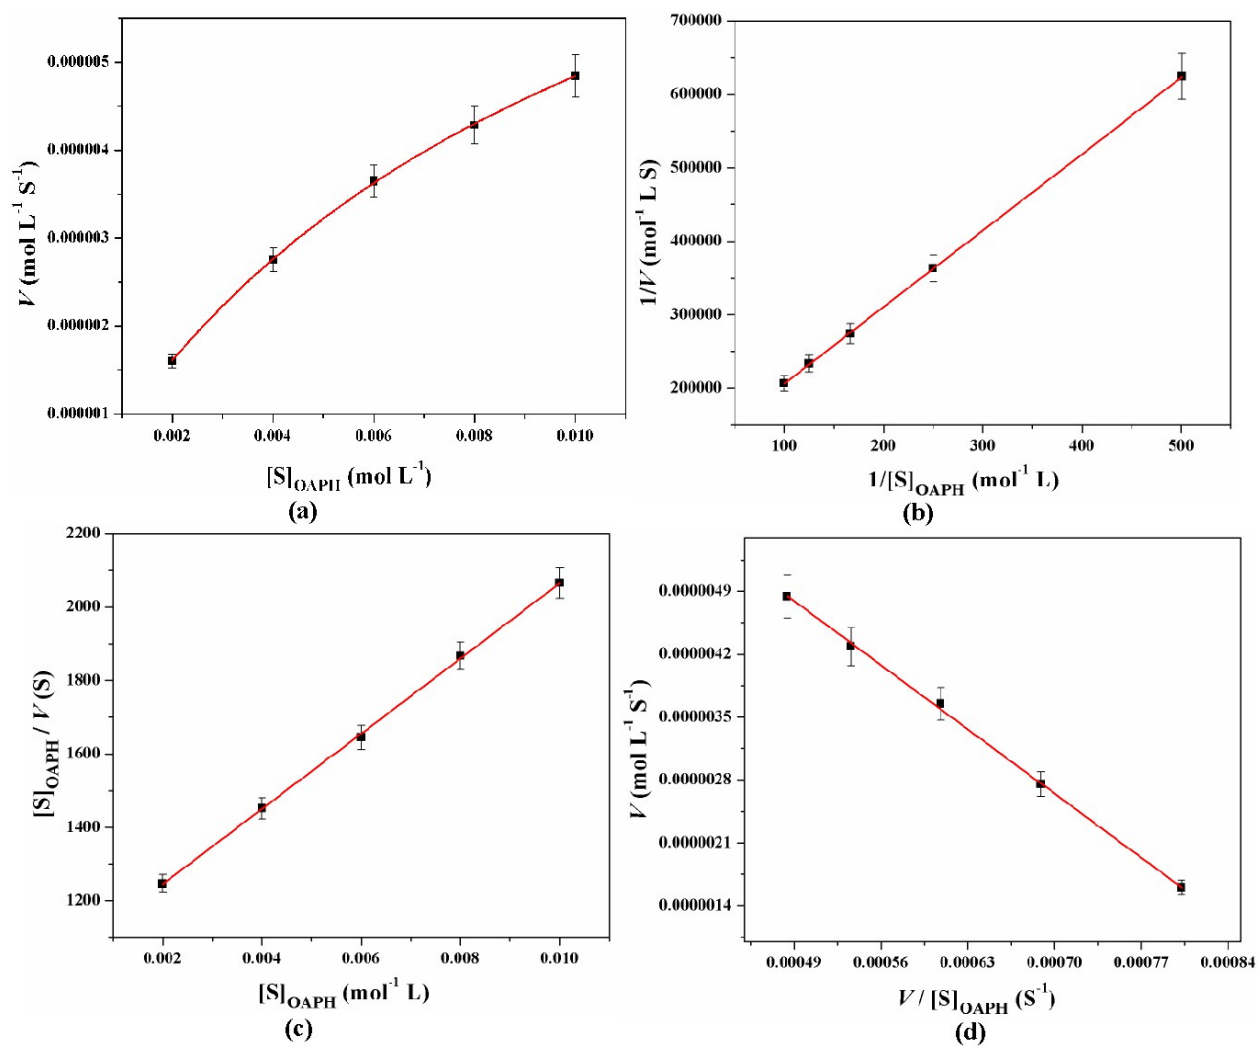

**Figure S12:** Michaelis-Menten plot (a), Lineweaver-Burk plot (b), Hanes plot (c) and Eadie-Hofstee plot (d) of complex **2** for catalytic oxidation of OAPH in acetonitrile-methanol (2:1) mixture at room temperature.

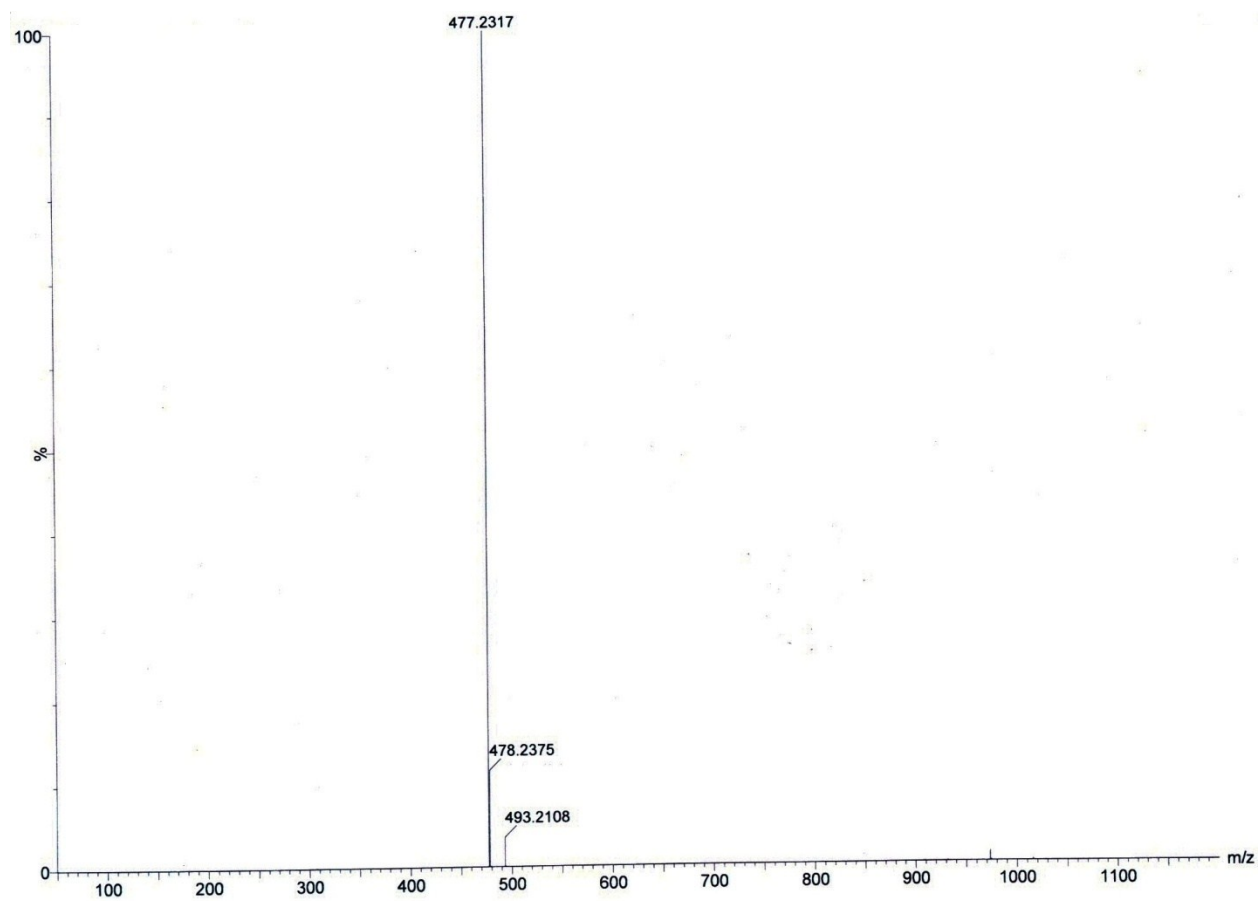

**Figure S13:** ESI-MS positive spectrum of complex **1** in acetonitrile-methanol (2:1) mixture at room temperature.

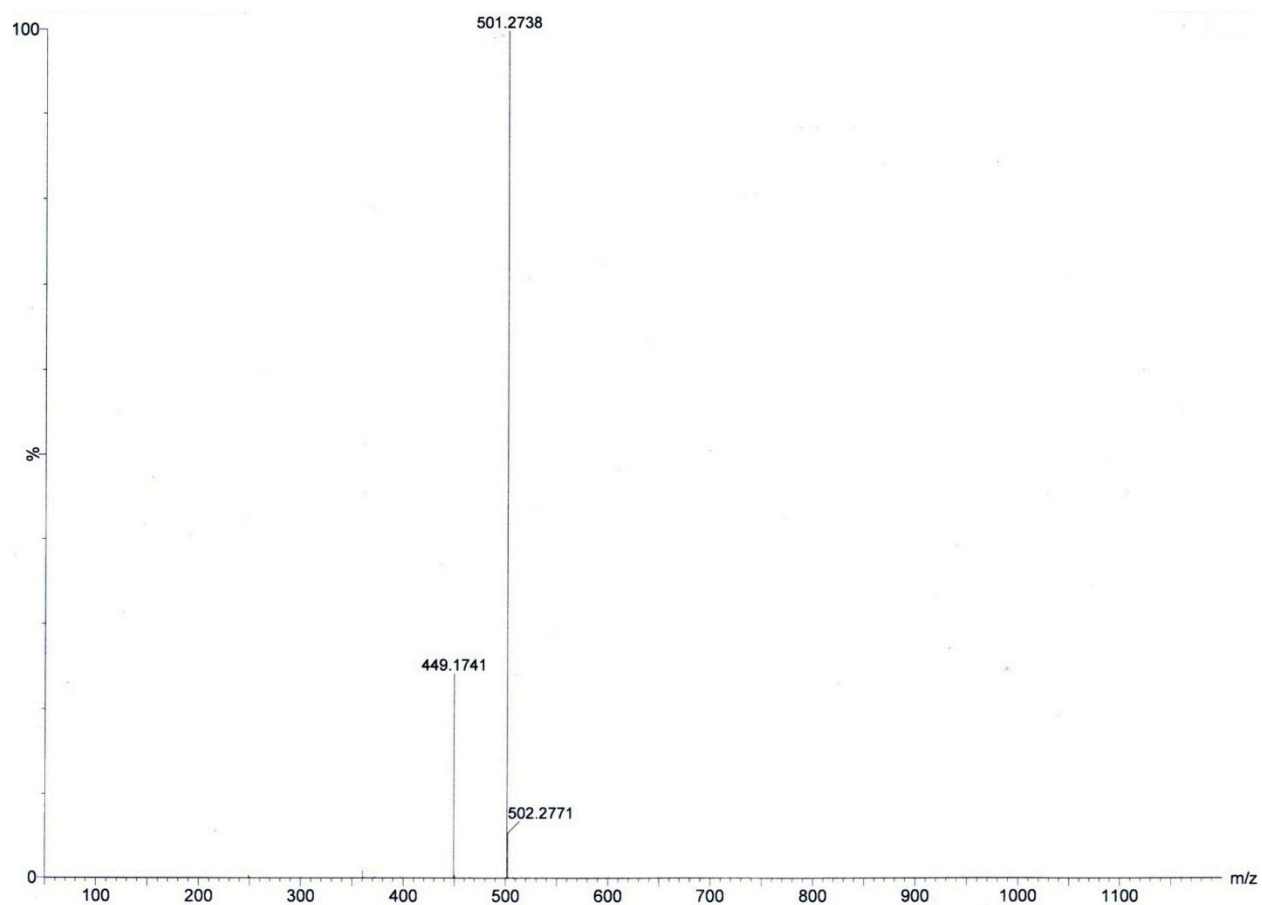

**Figure S14:** ESI-MS positive spectrum of complex **2** in acetonitrile-methanol (2:1) mixture at room temperature.
